# Supplementary material for: When and Where Birth Spacing Matters for Child Survival: An International Comparison Using the DHS
Source: Springer Nature journal article supplement (doi:10.1007/s13524-019-00798-y), 2019-07-03
Supplement: MOESM1 [file 16880476]

## Online Appendix

### When and Where Birth Spacing Matters for Child Survival: An International Comparison Using the DHS

Joseph Molitoris, Kieron Barclay, and Martin Kolk

Table A1. Country-specific samples included in final analysis.

| Country                  | Waves | Survey Years                          | Women  | Children | Deaths |
|--------------------------|-------|---------------------------------------|--------|----------|--------|
| Albania                  | 1     | 2008-09                               | 2,090  | 5,537    | 239    |
| Armenia                  | 2     | 2000; 2010                            | 4,610  | 11,063   | 705    |
| Azerbaijan               | 1     | 2006                                  | 2,267  | 5,895    | 502    |
| Bangladesh               | 4     | 1993-94; 2004;<br>2007; 2011          | 32,372 | 117,981  | 11,012 |
| Benin                    | 4     | 2006; 2001; 1996;<br>2011-12          | 20,578 | 84,554   | 6,398  |
| Bolivia                  | 4     | 1989; 2003; 1994;<br>2008             | 24,423 | 102,322  | 10,389 |
| Brazil                   | 3     | 1986; 1991; 1996                      | 7,810  | 30,344   | 3,083  |
| Burkina Faso             | 4     | 1998-99; 2003;<br>1993; 2010          | 20,394 | 90,893   | 9,102  |
| Burundi                  | 2     | 1987; 2010                            | 5,502  | 24,042   | 2,175  |
| Cambodia                 | 2     | 2000; 2005                            | 18,965 | 73,996   | 6,951  |
| Cameroon                 | 4     | 2011; 1998; 2004;<br>1991             | 13,625 | 58,478   | 4,581  |
| Central African Republic | 1     | 1994-95                               | 2,429  | 10,366   | 915    |
| Chad                     | 2     | 1996-97; 2004                         | 6,678  | 31,008   | 3,626  |
| Colombia                 | 5     | 1995; 1990; 2000;<br>1986; 2010       | 34,775 | 112,410  | 4,074  |
| Comoros                  | 2     | 2012; 1996                            | 2,710  | 11,795   | 748    |
| Congo Brazzaville        | 2     | 2005; 2011-12                         | 7,125  | 26,962   | 1,589  |
| Cote D'Ivoire            | 2     | 1994; 2011-12                         | 8,530  | 36,090   | 3,121  |
| DR Congo                 | 2     | 2007; 2013-14                         | 12,539 | 54,897   | 4,507  |
| Dominican Republic       | 6     | 1986; 2013; 2002;<br>1996; 1991; 2007 | 31,976 | 105,802  | 5,390  |
| Ecuador                  | 1     | 1987                                  | 1,776  | 7,348    | 694    |
| Egypt                    | 6     | 1992; 1995; 1988;<br>2008; 2014; 2000 | 56,254 | 208,862  | 16,910 |
| El Salvador              | 1     | 1985                                  | 713    | 1,618    | 121    |
| Ethiopia                 | 2     | 2005; 2000; 2016;<br>2011             | 18,654 | 85,094   | 8,931  |
| Gabon                    | 2     | 2000; 2012                            | 5,367  | 22,518   | 1,106  |
| Gambia                   | 1     | 2013                                  | 3,953  | 16,520   | 748    |
| Ghana                    | 5     | 2003; 1993; 2008;<br>1998; 1988       | 10,006 | 40,482   | 3,288  |

|            |   |                                             |         |         |        |
|------------|---|---------------------------------------------|---------|---------|--------|
| Guatemala  | 2 | 1995; 1987                                  | 8,148   | 36,547  | 3,195  |
| Guinea     | 3 | 2012; 1999; 2005                            | 11,191  | 47,818  | 5,425  |
| Guyana     | 1 | 2009                                        | 1,753   | 6,083   | 235    |
| Haiti      | 4 | 2005-06; 2000;<br>1994-95; 2012             | 13,217  | 55,962  | 4,660  |
| Honduras   | 2 | 2005-06; 2011-12                            | 15,179  | 58,138  | 1,989  |
| India      | 3 | 2005-06; 1998-99;<br>1992-93                | 136,798 | 469,405 | 40,373 |
| Indonesia  | 6 | 2007; 1994; 1987;<br>2002-03; 1991;<br>2012 | 84,009  | 296,467 | 22,846 |
| Jordan     | 5 | 1990; 2002; 2007;<br>2012; 1997             | 25,272  | 114,643 | 3,532  |
| Kazakhstan | 1 | 1995                                        | 2,027   | 6,218   | 420    |
| Kenya      | 5 | 1989; 1993; 2003;<br>1998; 2008-09          | 16,818  | 73,647  | 5,107  |
| Kyrgyzstan | 2 | 2012                                        | 4,271   | 13,380  | 735    |
| Lesotho    | 2 | 2009; 2004                                  | 4,295   | 14,674  | 1,038  |
| Liberia    | 3 | 1986; 2013; 2007                            | 9,816   | 41,861  | 5,549  |
| Madagascar | 4 | 2003-04; 1997;<br>2008-09; 1992             | 15,931  | 68,670  | 5,435  |
| Malawi     | 3 | 2010; 1992; 2000                            | 23,952  | 98,928  | 10,011 |
| Maldives   | 1 | 2009                                        | 3,006   | 11,855  | 588    |
| Mali       | 5 | 1987; 2006; 2012-<br>13; 1995-96; 2001      | 25,909  | 119,983 | 14,658 |
| Mexico     | 1 | 1987                                        | 3,412   | 14,515  | 1,023  |
| Moldova    | 1 | 2005                                        | 960     | 2,415   | 109    |
| Morocco    | 3 | 2003-04; 1992;<br>1987                      | 11,678  | 52,337  | 4,320  |
| Mozambique | 3 | 2003; 1997; 2011                            | 14,806  | 59,647  | 6,824  |
| Namibia    | 4 | 2006-07; 2000;<br>1992; 2013                | 9,627   | 34,763  | 1,931  |
| Nicaragua  | 2 | 2001; 1998                                  | 10,487  | 44,498  | 2,627  |
| Niger      | 4 | 2012; 1998; 2006;<br>1992                   | 18,063  | 87,474  | 9,474  |
| Nigeria    | 4 | 2003; 2008; 2013;<br>1990                   | 39,157  | 174,953 | 17,302 |
| Pakistan   | 3 | 2012-13; 2006-07;<br>1990-91                | 18,056  | 79,833  | 6,324  |
| Paraguay   | 1 | 1990                                        | 2,123   | 9,496   | 408    |

|                        |            |                                                |                  |                  |                |
|------------------------|------------|------------------------------------------------|------------------|------------------|----------------|
| Peru                   | 6          | 1986; 1991-92;<br>2004-06; 2009;<br>1996; 2000 | 70,369           | 265,456          | 17,699         |
| Philippines            | 5          | 1993; 1998; 2003;<br>2008; 2013                | 25,432           | 97,364           | 4,331          |
| Rwanda                 | 3          | 1992; 2010; 2000                               | 16,331           | 71,932           | 6,912          |
| Sao Tome &<br>Principe | 1          | 2008-09                                        | 1,147            | 4,429            | 230            |
| Senegal                | 4          | 2010-11; 1992-93;<br>2005; 1986                | 27,206           | 121,012          | 8,963          |
| Sierra Leone           | 2          | 2008; 2013                                     | 10,168           | 40,206           | 5,269          |
| South Africa           | 1          | 1998                                           | 3,307            | 11,018           | 717            |
| Sri Lanka              | 1          | 1987                                           | 2,954            | 10,287           | 371            |
| Sudan                  | 1          | 1989-90                                        | 3,474            | 17,516           | 1,375          |
| Swaziland              | 1          | 2006-07                                        | 1,610            | 6,304            | 396            |
| Tajikistan             | 1          | 2012                                           | 3,478            | 11,475           | 641            |
| Tanzania               | 4          | 2010; 1991-92;<br>2004-05; 1996                | 17,761           | 77,778           | 6,723          |
| Thailand               | 1          | 1987                                           | 2,775            | 9,398            | 511            |
| Timor Leste            | 1          | 2009-10                                        | 5,555            | 25,111           | 1,904          |
| Togo                   | 3          | 2013-14; 1998;<br>1988                         | 9,088            | 38,040           | 2,965          |
| Trinidad & Tobago      | 1          | 1987                                           | 1,213            | 4,423            | 179            |
| Tunisia                | 1          | 1988                                           | 2,537            | 10,811           | 851            |
| Turkey                 | 3          | 1993; 1998; 2003                               | 9,003            | 32,347           | 2,923          |
| Uganda                 | 5          | 1995; 2011; 2000-<br>01; 1988-89; 2006         | 16,980           | 78,993           | 6,986          |
| Ukraine                | 1          | 2007                                           | 413              | 996              | 47             |
| Uzbekistan             | 1          | 1996                                           | 1,604            | 5,476            | 272            |
| Yemen                  | 1          | 1991-92                                        | 3,851            | 20,542           | 2,468          |
| Zambia                 | 5          | 1992; 2007; 1996;<br>2001-02; 2013-14          | 19,949           | 87,004           | 7,042          |
| Zimbabwe               | 5          | 1994; 2010-11;<br>1999; 1988; 2005-<br>06      | 11,856           | 45,123           | 2,409          |
| <b>Total</b>           | <b>207</b> |                                                | <b>1,154,143</b> | <b>4,564,128</b> | <b>369,227</b> |

Table A2. OLS and FE models of the effects of birth intervals on infant mortality.

|                                 | OLS       |             | FE        |             |
|---------------------------------|-----------|-------------|-----------|-------------|
|                                 | <i>B</i>  | <i>S.E.</i> | <i>B</i>  | <i>S.E.</i> |
| Preceding Interval              | -0.173    | 0.002       | -0.153    | 0.002       |
| Preceding Interval <sup>2</sup> | 0.048     | 0.001       | 0.040     | 0.001       |
| Preceding Interval <sup>3</sup> | -0.006    | 0.000       | -0.005    | 0.000       |
| Preceding Interval <sup>4</sup> | 0.000     | 0.000       | 0.000     | 0.000       |
| Female                          | -0.009    | 0.000       | -0.009    | 0.000       |
| Birth year                      | -0.001    | 0.000       | 0.008     | 0.000       |
| Birth year <sup>2</sup>         | 0.000     | 0.000       | 0.000     | 0.000       |
| Birth year <sup>3</sup>         | 0.000     | 0.000       | 0.000     | 0.000       |
| Previous Sibling Died           | 0.094     | 0.000       | -0.072    | 0.000       |
| Birth Order                     |           |             |           |             |
| 2                               | (ref)     |             | (ref)     |             |
| 3                               | -0.006    | 0.000       | -0.033    | 0.000       |
| 4                               | -0.001    | 0.000       | -0.063    | 0.001       |
| 5                               | 0.003     | 0.000       | -0.090    | 0.001       |
| 6                               | 0.007     | 0.001       | -0.115    | 0.001       |
| 7                               | 0.012     | 0.001       | -0.139    | 0.001       |
| 8+                              | 0.020     | 0.001       | -0.181    | 0.002       |
| Constant                        | 0.270     | 0.001       |           |             |
| Children                        | 4,564,128 |             | 4,564,128 |             |
| Mothers                         | 1,154,143 |             | 1,154,143 |             |
| F-statistic for model fit       | 11,867.1  |             | 5,171.8   |             |
| R <sup>2</sup>                  | 0.038     |             | 0.022     |             |
| F-statistic for FE              |           |             | 1.12      |             |
| Rho                             |           |             | 0.322     |             |

Note: Superscripts refer to higher-order polynomial terms.

Table A3. OLS and FE models of the effects of birth intervals on infant mortality using a categorical operationalization of interval length.

|                         | OLS         |       | FE          |       |
|-------------------------|-------------|-------|-------------|-------|
|                         | Coefficient | S.E.  | Coefficient | S.E.  |
| Preceding Interval      |             |       |             |       |
| <12                     | 0.104       | 0.001 | 0.092       | 0.001 |
| 12-14                   | 0.059       | 0.001 | 0.057       | 0.001 |
| 15-17                   | 0.034       | 0.001 | 0.035       | 0.001 |
| 18-20                   | 0.019       | 0.001 | 0.019       | 0.001 |
| 21-23                   | 0.010       | 0.001 | 0.008       | 0.001 |
| 24-26                   | (ref)       |       | (ref)       |       |
| 27-29                   | -0.004      | 0.001 | -0.004      | 0.001 |
| 30-32                   | -0.010      | 0.001 | -0.011      | 0.001 |
| 33-35                   | -0.017      | 0.001 | -0.021      | 0.001 |
| 36-38                   | -0.023      | 0.001 | -0.028      | 0.001 |
| 39-41                   | -0.024      | 0.001 | -0.029      | 0.001 |
| 42-44                   | -0.024      | 0.001 | -0.028      | 0.001 |
| 45-47                   | -0.029      | 0.001 | -0.035      | 0.001 |
| 48-50                   | -0.033      | 0.001 | -0.039      | 0.001 |
| 51-53                   | -0.032      | 0.001 | -0.038      | 0.001 |
| 54-56                   | -0.032      | 0.001 | -0.037      | 0.001 |
| 57-59                   | -0.034      | 0.001 | -0.043      | 0.001 |
| 60-62                   | -0.035      | 0.001 | -0.045      | 0.001 |
| 63-65                   | -0.033      | 0.001 | -0.044      | 0.002 |
| 66-68                   | -0.034      | 0.001 | -0.043      | 0.002 |
| 69-71                   | -0.034      | 0.001 | -0.046      | 0.002 |
| 72-74                   | -0.035      | 0.002 | -0.048      | 0.002 |
| 75-77                   | -0.034      | 0.002 | -0.046      | 0.002 |
| 78-80                   | -0.033      | 0.002 | -0.048      | 0.002 |
| 81-83                   | -0.032      | 0.002 | -0.048      | 0.002 |
| 84+                     | -0.032      | 0.001 | -0.052      | 0.001 |
| Female                  | -0.009      | 0.000 | -0.009      | 0.000 |
| Birth year              | -0.001      | 0.000 | 0.008       | 0.000 |
| Birth year <sup>2</sup> | 0.000       | 0.000 | 0.000       | 0.000 |
| Birth year <sup>3</sup> | 0.000       | 0.000 | 0.000       | 0.000 |
| Previous Sibling Died   | 0.094       | 0.000 | -0.072      | 0.000 |
| Birth Order             |             |       |             |       |
| 2                       | (ref)       |       | (ref)       |       |
| 3                       | -0.006      | 0.000 | -0.033      | 0.000 |
| 4                       | -0.002      | 0.000 | -0.063      | 0.001 |

|                           |           |       |           |       |
|---------------------------|-----------|-------|-----------|-------|
| 5                         | 0.003     | 0.000 | -0.090    | 0.001 |
| 6                         | 0.007     | 0.001 | -0.116    | 0.001 |
| 7                         | 0.012     | 0.001 | -0.140    | 0.001 |
| 8+                        | 0.020     | 0.001 | -0.181    | 0.002 |
| Constant                  | 0.070     | 0.000 |           |       |
| Children                  | 4,564,128 |       | 4,564,128 |       |
| Mothers                   | 1,154,143 |       | 1,154,143 |       |
| F-statistic for model fit | 4982.69   |       | 2168.45   |       |
| R <sup>2</sup>            | 0.038     |       | 0.022     |       |
| F-statistic for FE        |           |       | 1.12      |       |
| Rho                       |           |       | 0.322     |       |

Note: Superscripts refer to higher-order polynomial terms.

Table A4. OLS and FE models of the effects of birth intervals on infant mortality for children born within 10 years of the survey.

|                                 | OLS       |             | FE        |             |
|---------------------------------|-----------|-------------|-----------|-------------|
|                                 | <i>B</i>  | <i>S.E.</i> | <i>B</i>  | <i>S.E.</i> |
| Preceding Interval              | -0.167    | 0.002       | -0.131    | 0.003       |
| Preceding Interval <sup>2</sup> | 0.046     | 0.001       | 0.034     | 0.001       |
| Preceding Interval <sup>3</sup> | -0.005    | 0.000       | -0.004    | 0.000       |
| Preceding Interval <sup>4</sup> | 0.000     | 0.000       | 0.000     | 0.000       |
| Female                          | -0.008    | 0.000       | -0.008    | 0.000       |
| Birth year                      | 0.000     | 0.000       | 0.008     | 0.000       |
| Birth year <sup>2</sup>         | 0.000     | 0.000       | 0.000     | 0.000       |
| Birth year <sup>3</sup>         | 0.000     | 0.000       | 0.000     | 0.000       |
| Previous Sibling Died           | 0.077     | 0.001       | -0.169    | 0.001       |
| Birth Order                     |           |             |           |             |
| 2                               | (ref)     |             | (ref)     |             |
| 3                               | -0.013    | 0.001       | -0.046    | 0.001       |
| 4                               | -0.009    | 0.001       | -0.086    | 0.001       |
| 5                               | -0.005    | 0.001       | -0.122    | 0.002       |
| 6                               | 0.000     | 0.001       | -0.155    | 0.002       |
| 7                               | 0.005     | 0.001       | -0.187    | 0.002       |
| 8+                              | 0.015     | 0.001       | -0.230    | 0.003       |
| Constant                        | 0.273     | 0.002       |           |             |
| Children                        | 2,329,949 |             | 2,329,949 |             |
| Mothers                         | 922,402   |             | 922,402   |             |
| F-statistic for model fit       | 4,835.6   |             | 5,479.3   |             |
| R <sup>2</sup>                  | 0.030     |             | 0.055     |             |
| F-statistic for FE              |           |             | 1.12      |             |
| Rho                             |           |             | 0.434     |             |

Note: Superscripts refer to higher-order polynomial terms.

Table A5. OLS and FE models of the effects of birth intervals on infant mortality using a categorical operationalization of interval length for children born within 10 years of the survey.

|                         | OLS         |       | FE          |       |
|-------------------------|-------------|-------|-------------|-------|
|                         | Coefficient | S.E.  | Coefficient | S.E.  |
| Preceding Interval      |             |       |             |       |
| <12                     | 0.101       | 0.001 | 0.078       | 0.001 |
| 12-14                   | 0.058       | 0.001 | 0.048       | 0.001 |
| 15-17                   | 0.034       | 0.001 | 0.031       | 0.001 |
| 18-20                   | 0.020       | 0.001 | 0.017       | 0.001 |
| 21-23                   | 0.010       | 0.001 | 0.007       | 0.001 |
| 24-26                   | (ref)       |       | (ref)       |       |
| 27-29                   | -0.006      | 0.001 | -0.007      | 0.001 |
| 30-32                   | -0.012      | 0.001 | -0.013      | 0.001 |
| 33-35                   | -0.019      | 0.001 | -0.022      | 0.001 |
| 36-38                   | -0.022      | 0.001 | -0.026      | 0.001 |
| 39-41                   | -0.023      | 0.001 | -0.027      | 0.001 |
| 42-44                   | -0.024      | 0.001 | -0.027      | 0.001 |
| 45-47                   | -0.028      | 0.001 | -0.033      | 0.001 |
| 48-50                   | -0.030      | 0.001 | -0.036      | 0.001 |
| 51-53                   | -0.030      | 0.001 | -0.033      | 0.002 |
| 54-56                   | -0.030      | 0.001 | -0.032      | 0.002 |
| 57-59                   | -0.030      | 0.001 | -0.035      | 0.002 |
| 60-62                   | -0.032      | 0.001 | -0.039      | 0.002 |
| 63-65                   | -0.031      | 0.002 | -0.039      | 0.002 |
| 66-68                   | -0.030      | 0.002 | -0.036      | 0.002 |
| 69-71                   | -0.031      | 0.002 | -0.036      | 0.003 |
| 72-74                   | -0.032      | 0.002 | -0.038      | 0.003 |
| 75-77                   | -0.031      | 0.002 | -0.039      | 0.003 |
| 78-80                   | -0.029      | 0.002 | -0.034      | 0.003 |
| 81-83                   | -0.028      | 0.002 | -0.037      | 0.004 |
| 84+                     | -0.028      | 0.001 | -0.036      | 0.002 |
| Female                  | -0.008      | 0.000 | -0.008      | 0.000 |
| Birth year              | 0.000       | 0.000 | 0.008       | 0.000 |
| Birth year <sup>2</sup> | 0.000       | 0.000 | 0.000       | 0.000 |
| Birth year <sup>3</sup> | 0.000       | 0.000 | 0.000       | 0.000 |
| Previous Sibling Died   | 0.077       | 0.001 | -0.169      | 0.001 |
| Birth Order             |             |       |             |       |
| 2                       | (ref)       |       | (ref)       |       |
| 3                       | -0.013      | 0.001 | -0.046      | 0.001 |
| 4                       | -0.010      | 0.001 | -0.086      | 0.001 |



|                           |           |       |           |       |
|---------------------------|-----------|-------|-----------|-------|
| 5                         | -0.005    | 0.001 | -0.122    | 0.002 |
| 6                         | 0.000     | 0.001 | -0.155    | 0.002 |
| 7                         | 0.005     | 0.001 | -0.187    | 0.002 |
| 8+                        | 0.014     | 0.001 | -0.230    | 0.003 |
| Constant                  | 0.079     | 0.001 |           |       |
| Children                  | 2,329,949 |       | 2,329,949 |       |
| Mothers                   | 922,402   |       | 922,402   |       |
| F-statistic for model fit | 2027.8    |       | 2285.44   |       |
| R <sup>2</sup>            | 0.030     |       | 0.055     |       |
| F-statistic for FE        |           |       | 1.12      |       |
| Rho                       |           |       | 0.434     |       |

Note: Superscripts refer to higher-order polynomial terms.

Table A6. Countries included in UN sub-regions.

| UN sub-region               | Countries                                                                                                            |
|-----------------------------|----------------------------------------------------------------------------------------------------------------------|
| Caribbean                   | Dominican Republic; Haiti; Trinidad & Tobago                                                                         |
| Central America             | El Salvador; Guatemala; Honduras; Mexico; Nicaragua                                                                  |
| Central Asia                | Kazakhstan; Kyrgyzstan; Tajikistan; Uzbekistan                                                                       |
| Eastern Africa              | Burundi; Comoros; Ethiopia; Kenya; Madagascar; Malawi; Mozambique; Rwanda; Tanzania; Uganda; Zambia; Zimbabwe        |
| Middle Africa               | Cameroon; Central African Republic; Chad; Congo Brazzaville; DR Congo; Gabon; Sao Tome & Principe                    |
| Northern Africa             | Egypt; Morocco; Sudan; Tunisia                                                                                       |
| South America               | Bolivia; Brazil; Colombia; Ecuador; Guyana; Paraguay; Peru                                                           |
| South-eastern Asia          | Cambodia; Indonesia; Phillipines; Thailand; Timor Leste                                                              |
| Southern Africa             | Lesotho; Namibia; South Africa; Swaziland                                                                            |
| Southern and Eastern Europe | Bangladesh; India; Maldives; Pakistan; Sri Lanka                                                                     |
| Southern Asia               | Albania; Moldova; Ukraine                                                                                            |
| Western Africa              | Benin; Burkina Faso; Cote DIvoire; Gambia; Ghana; Guinea; Liberia; Mali; Niger; Nigeria; Senegal; Sierra Leone; Togo |
| Western Asia                | Armenia; Azerbaijan; Jordan; Turkey; Yemen                                                                           |

Note: Regional groupings may be found at <https://unstats.un.org/unsd/methodology/m49/>.

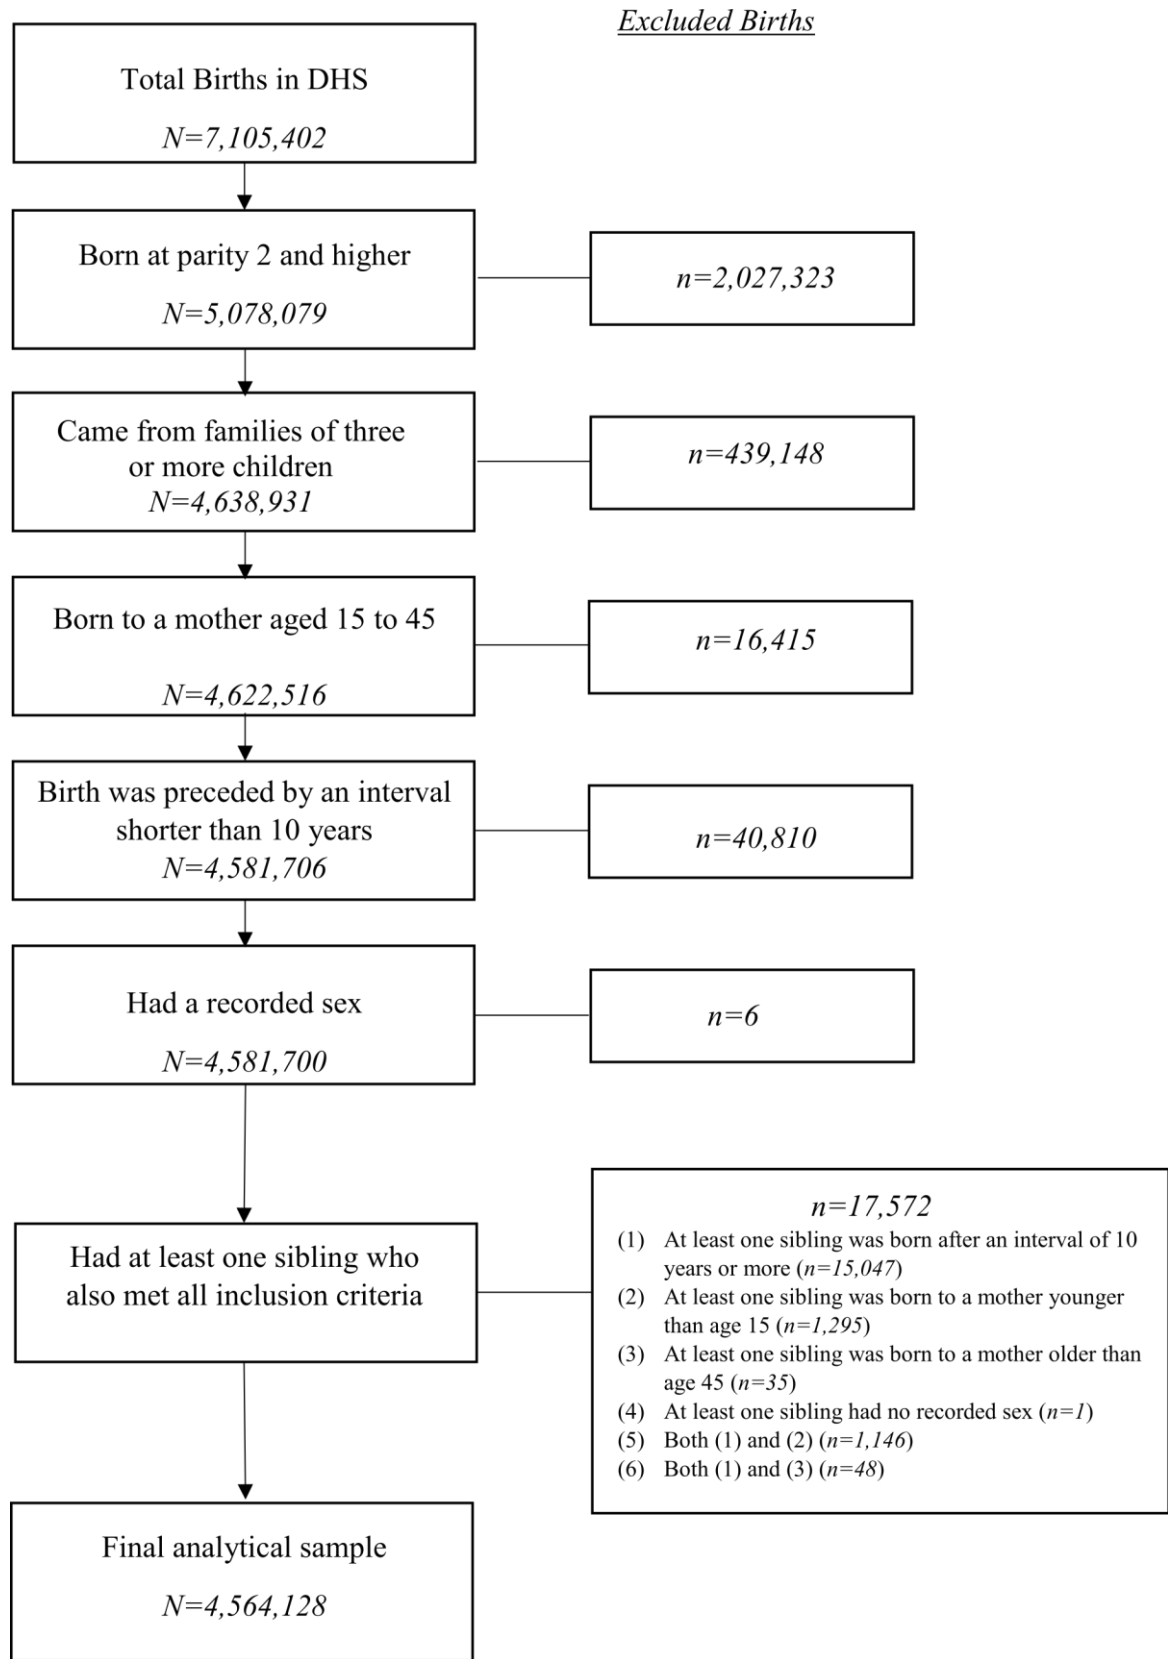

Figure A1. Sample selection flow chart.

# I. STRATIFIED ANALYSES

(1) Low Mortality (IMR <50 per 1000)

(a) No Education

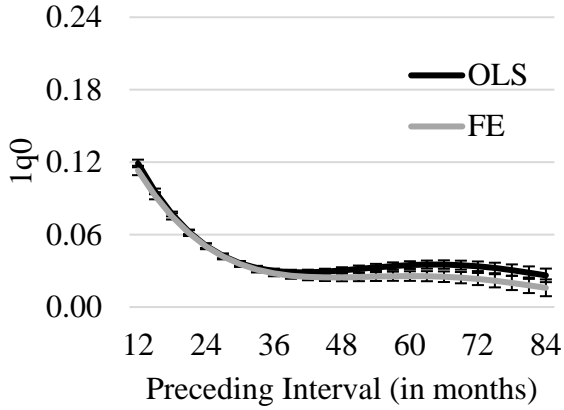

(b) Primary

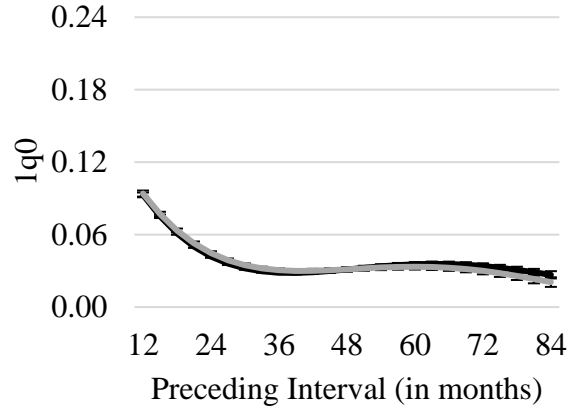

(c) Secondary

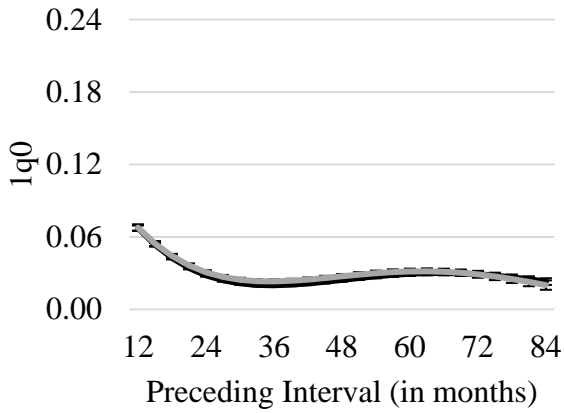

(d) Tertiary

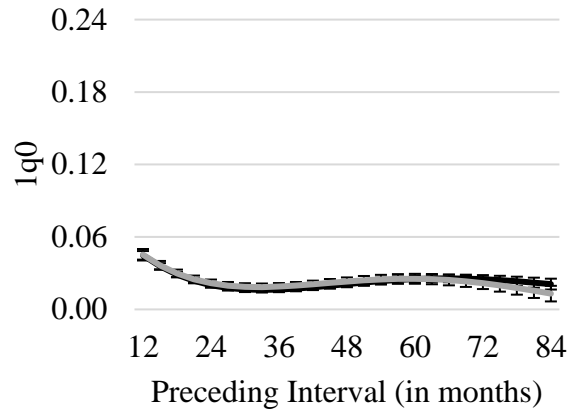

(2) Medium Mortality ( $100 > IMR \geq 50$ )

(a) No Education

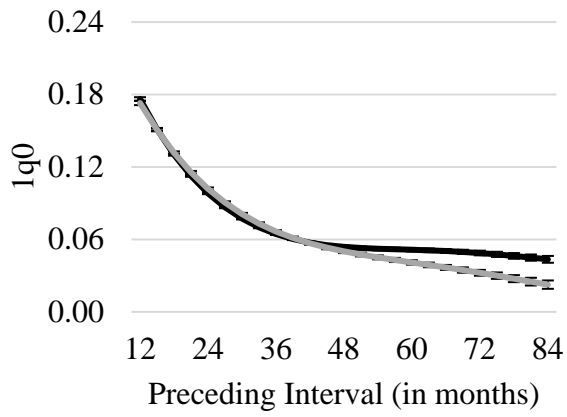

(b) Primary

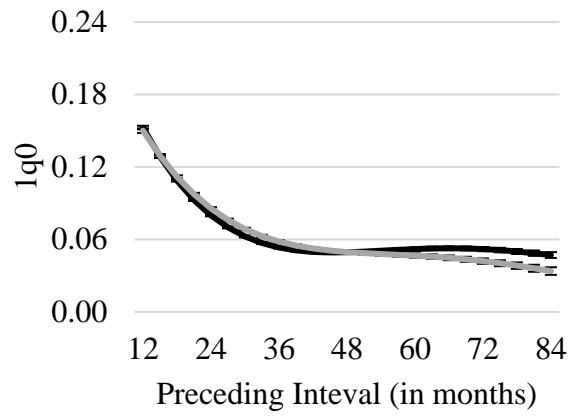

(c) Secondary

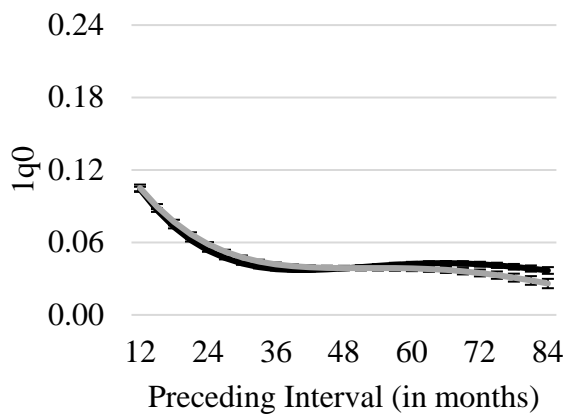

(d) Tertiary

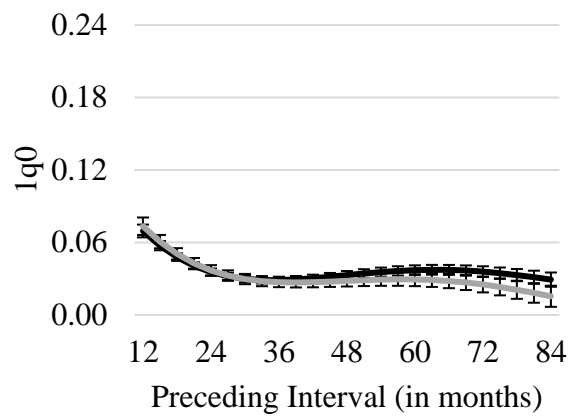

(3) High Mortality ( $IMR \geq 100$  per 1000)

(a) No Education

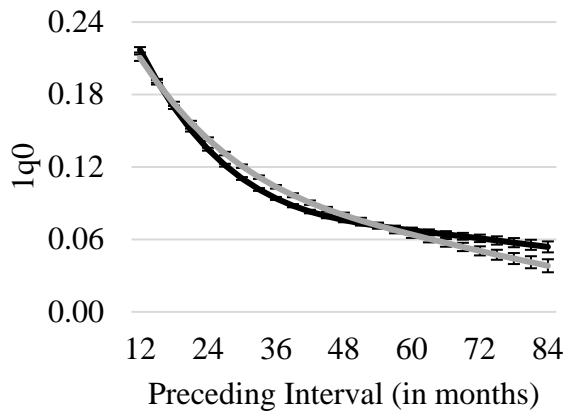

(b) Primary

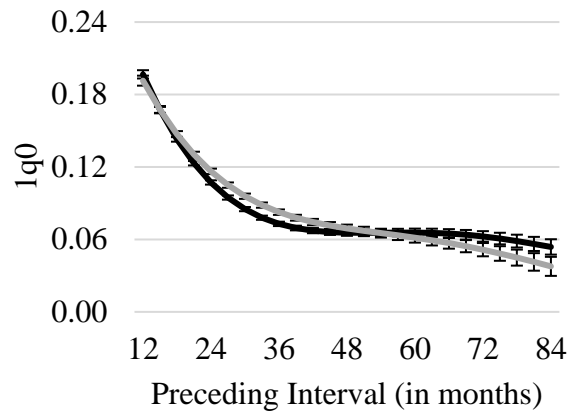

(c) Secondary

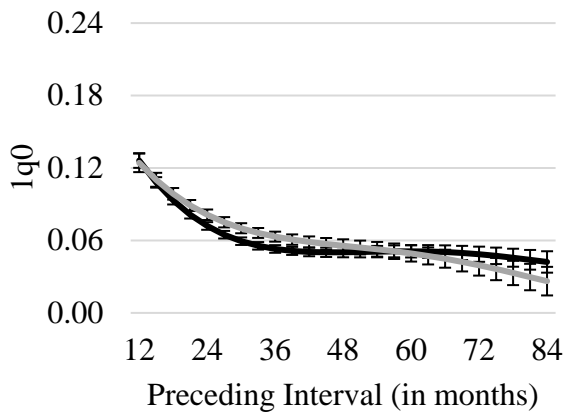

(d) Tertiary

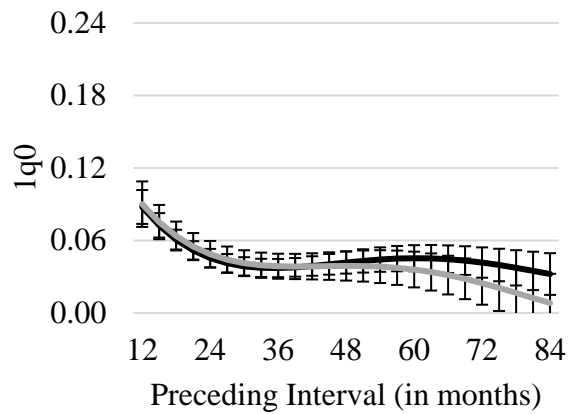

Figure A2. Predicted probabilities of dying before age one at different interval lengths and by mother's educational attainment by infant mortality context.

Note: Estimates are from models stratified by a woman's highest level of education and the overall level of infant mortality recorded for all births in a particular survey. Error bars represent 95% confidence intervals.

(a) Life expectancy at birth (both sexes)

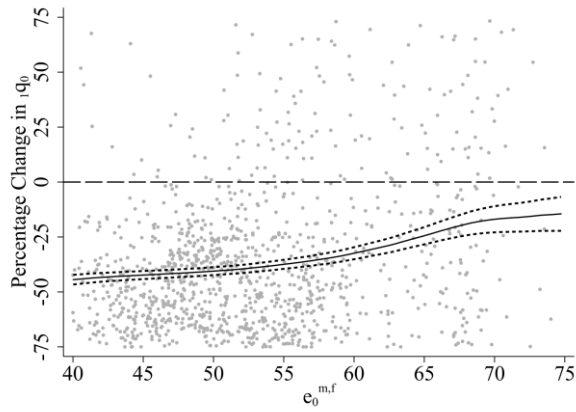

(b) Human Development Index

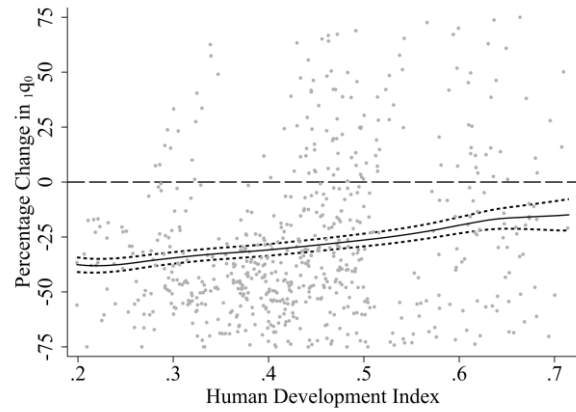

Figure A3. Marginal effect of increasing interval length from 12 to 24 months by the (a) life expectancy at birth and (b) Human Development Index.

Note: A kernel-weighted local polynomial smoothed trend has been superimposed with 95% confidence intervals.

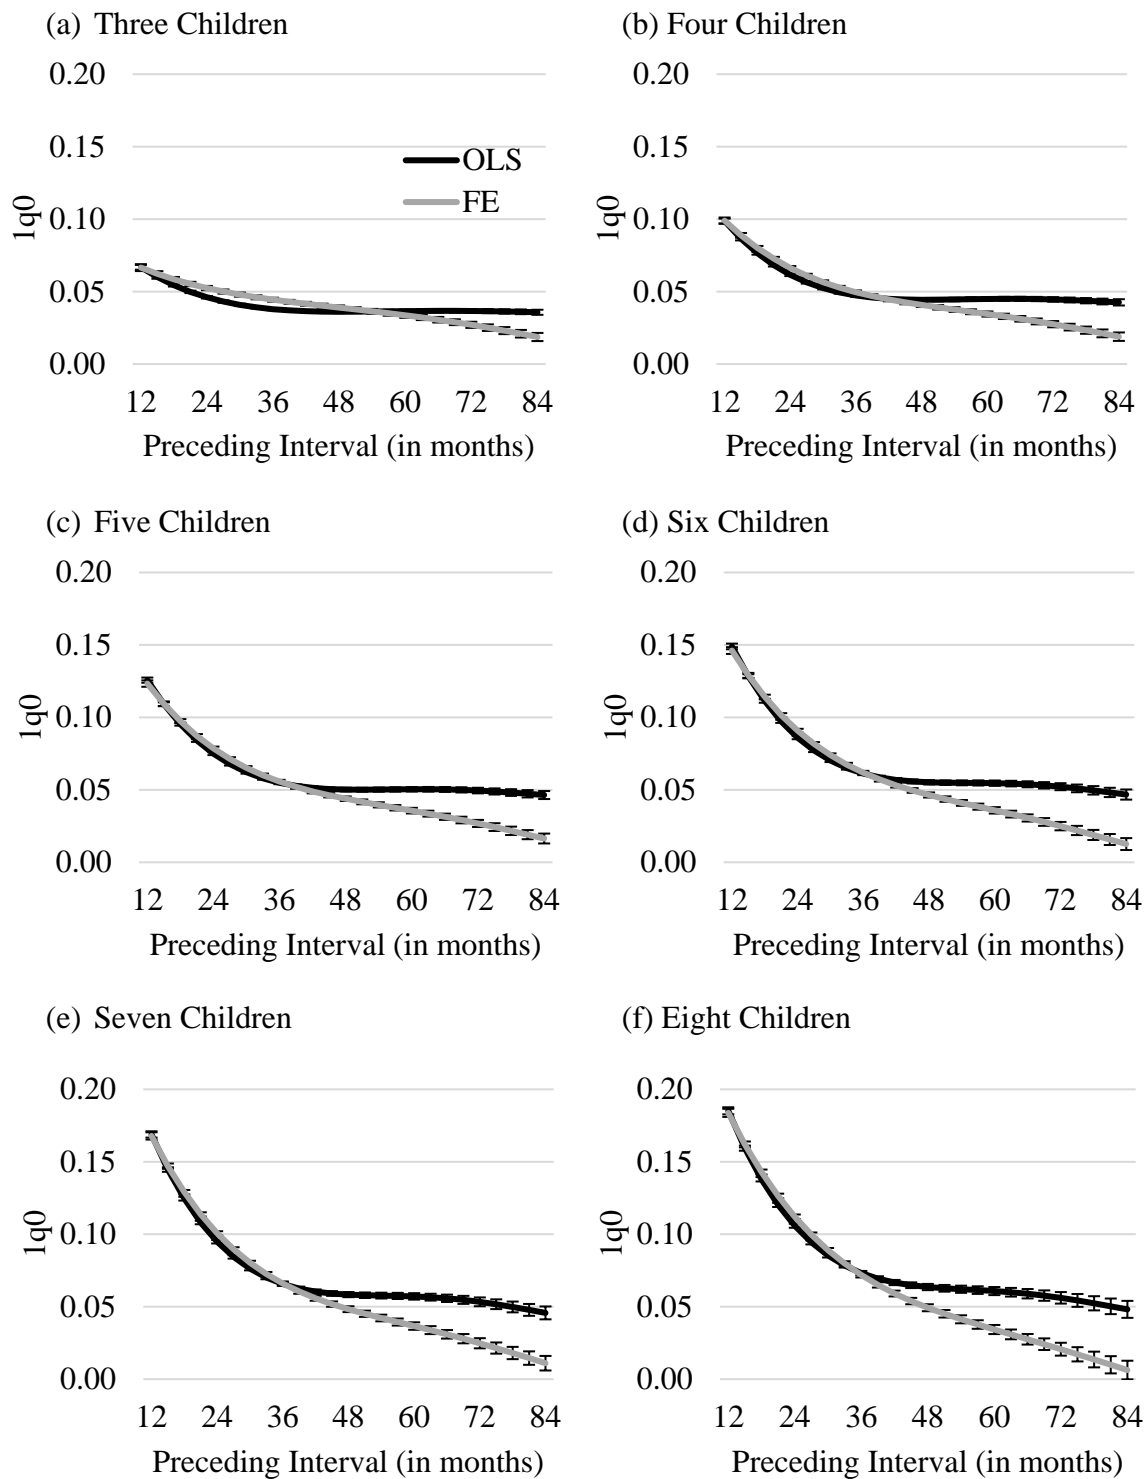

Figure A4. Predicted probabilities of dying before age one at different interval lengths and by total children ever born at the time of interview.

Note: Estimates are from models stratified by a mother's number of children ever born. Error bars represent 95% confidence intervals.



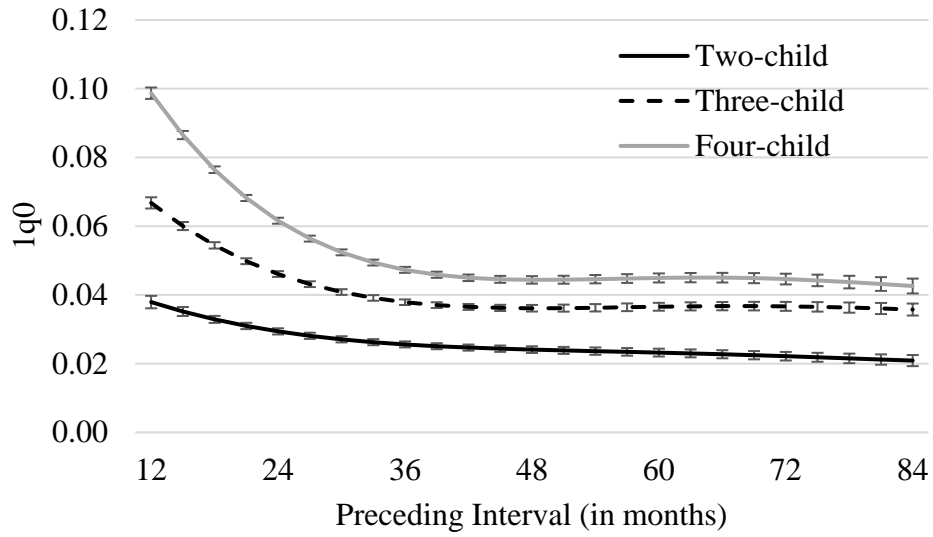

Figure A5. Comparison of predicted probabilities of dying before age one by interval length from between-family models for two-child, three-child, and four-child families.

Note: Error bars represent 95% confidence intervals.

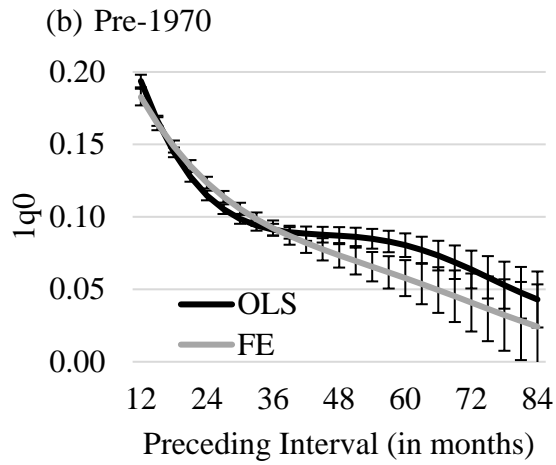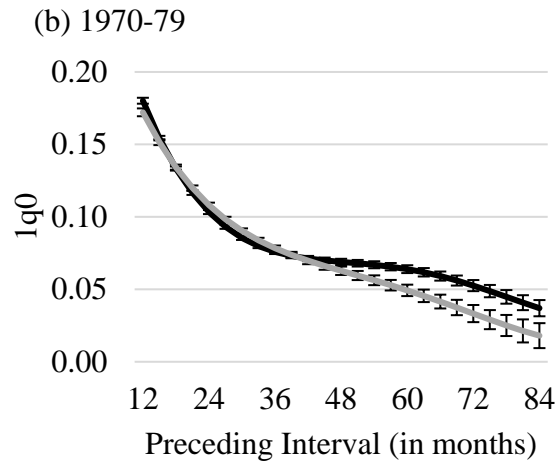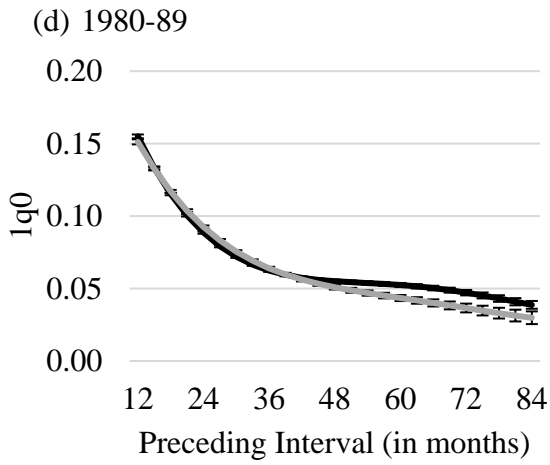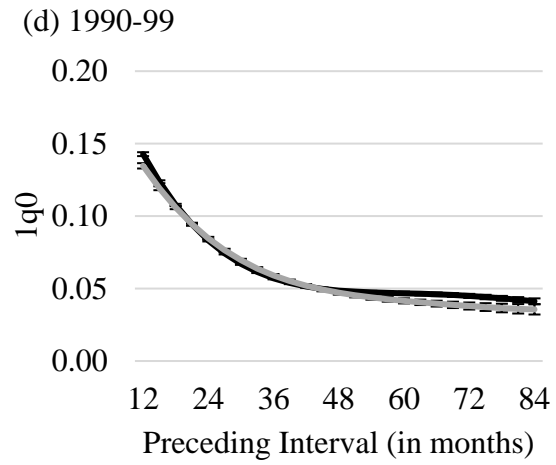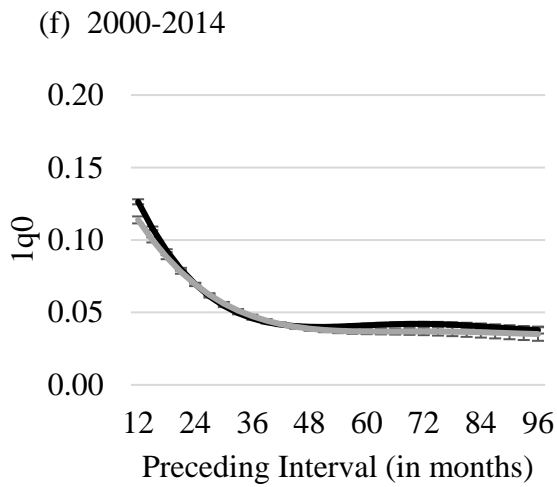

Figure A6. Predicted probabilities of dying before age one at different interval lengths and by index child's birth cohort.

Note: Estimates are from models stratified by the index child's birth cohort. Error bars represent 95% confidence intervals.

## II. SUB-SAMPLE ANALYSES

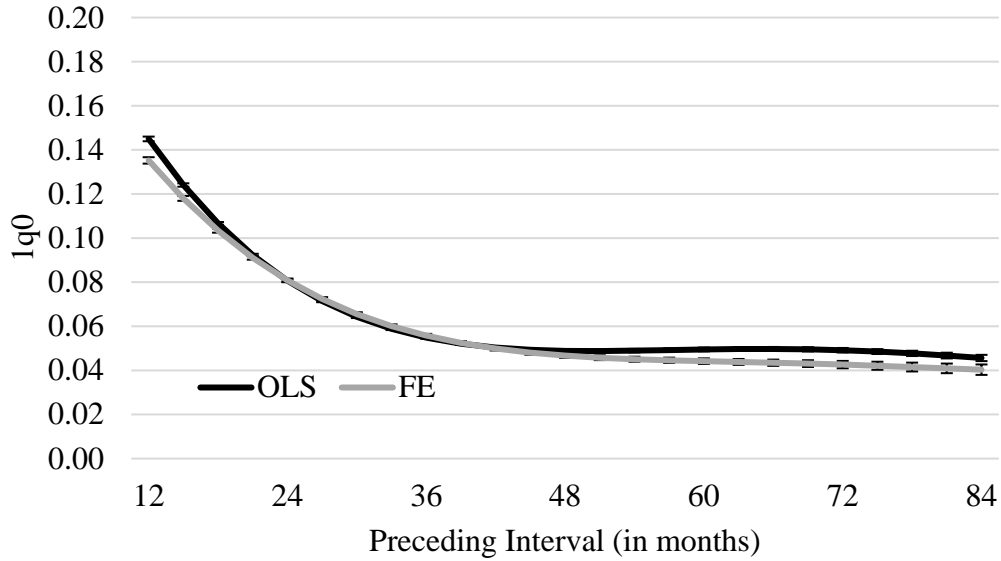

Figure A7. Predicted probabilities of dying before age 1 at different interval lengths in OLS and FE models among children born within ten years of survey.

Note: A ten-year cutoff was chosen because it has been shown that the misreporting and displacement of births tends to be low within that time frame (see Schoumaker 2014). Error bars represent 95% confidence intervals.

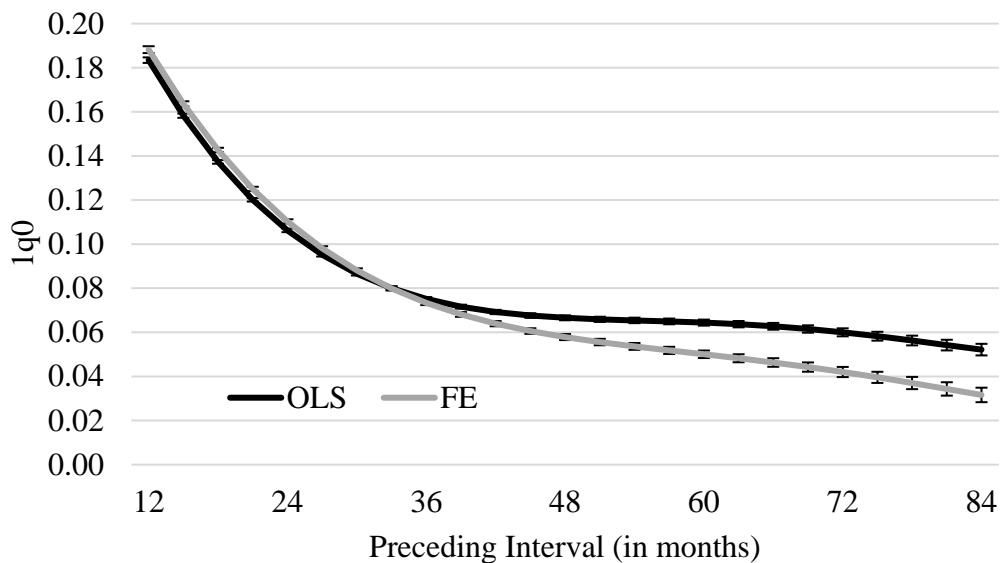

Figure A8. Predicted probabilities of dying before age 1 at different interval lengths in OLS and FE models among children born at even parities.

Note: Estimates based on models including only children born at even parities in families of four or more. This is to be sure that the death of the index child cannot also be included as the death of the previous sibling variable. Error bars represent 95% confidence intervals.

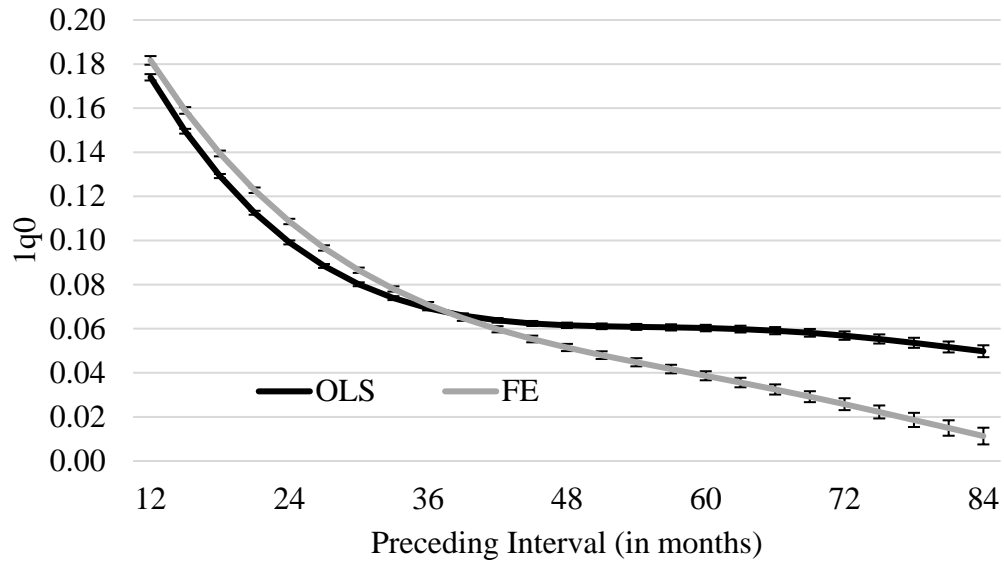

Figure A9. Predicted probabilities of dying before age 1 at different interval lengths in OLS and FE models among children born at odd parities.

Note: Estimates based on models including only children born at odd parities in families of five or more. This is to be sure that the death of the index child cannot also be included as the death of the previous sibling variable. Error bars represent 95% confidence intervals.

### III. CHANGING REFERENCE INTERVAL LENGTH

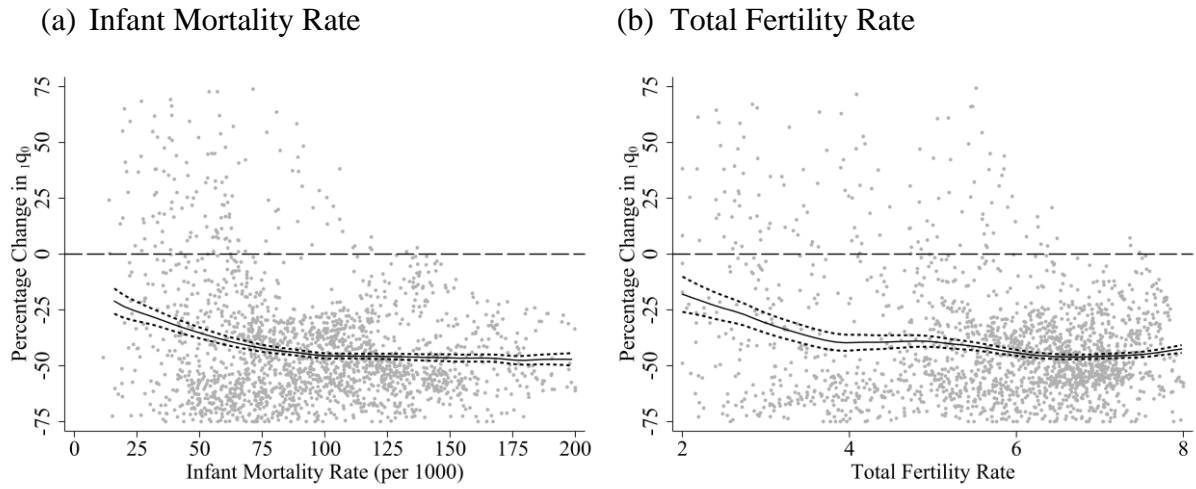

Figure A10. Marginal effect of increasing interval length from 18 to 30 months by the (a) infant mortality rate and (b) total fertility rate.

Note: A kernel-weighted local polynomial smoothed trend has been superimposed with 95% confidence intervals.

(a) Infant Mortality Rate

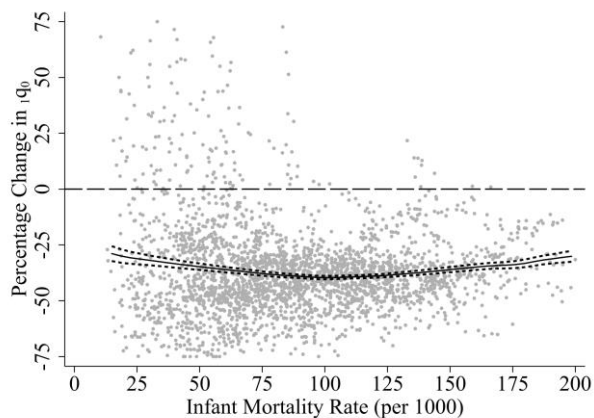

(b) Total Fertility Rate

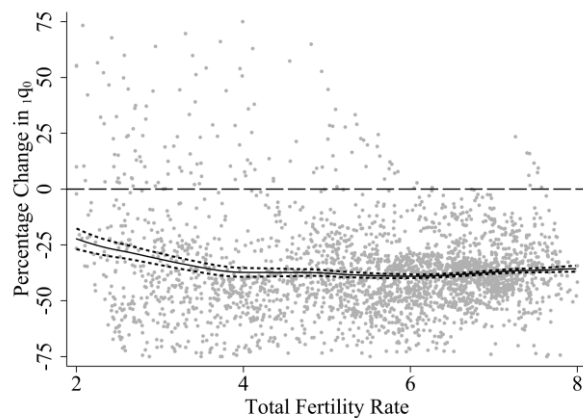

Figure A11. Marginal effect of increasing interval length from 24 to 36 months by the (a) infant mortality rate and (b) total fertility rate.

Note: A kernel-weighted local polynomial smoothed trend has been superimposed with 95% confidence intervals.

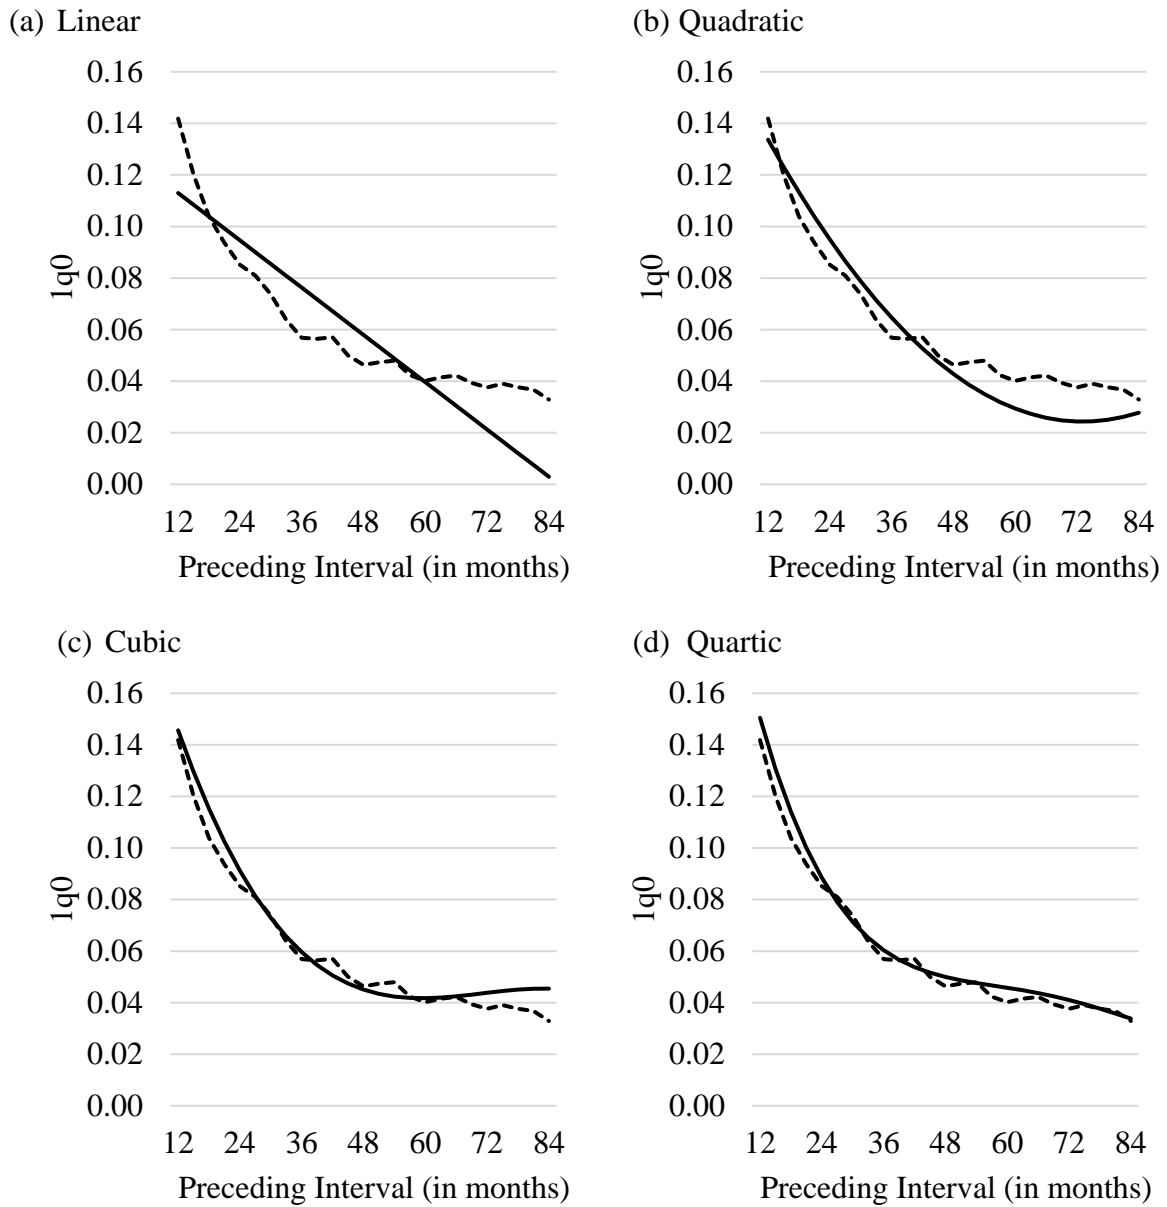

Figure A12. Comparing predicted probabilities of infant mortality from models using categorical and polynomial operationalizations of the length of the previous interval.

Note: Dashed line refers to the categorical operationalization.
